# Supplementary material for: Triple Helix and the evolution of ecosystems of innovation: the case of Silicon Valley
Source: Springer Nature journal article supplement (doi:10.1186/s40604-018-0060-x), 2018-12-01
Supplement: MOESM1 [file 16318588]

## Multilingual abstracts

### Arabic

المراوح الثلاثة وتطور النظام الايكولوجي للابتكار: حالة سيلكون فالي

تطور النظام الايكولوجي للابتكار لسيلكون فالي في العقد الماضي . تهدف هذه الدراسة إلى فهم كيف ولماذا تطور السيلكون فالي عن طريق تحديد التغييرات التي طرأت على دور مكونات المراوح الثلاثة. كما تهدف إلى تحديد إذا ما كانت التغييرات في احد المكونات تؤدي إلى تطورات المكونات الأخرى. وقع تحليل النتائج بالاعتماد على نموذج المراوح الثلاثة وتفسيرها على ضوء فترات تطوير الشركات وذلك باعتبار المؤسسات الناشئة كوحدة للتحليل وباستعمال منهج دراسة الحالات المتعددة. تشير النتائج إلى أن دور مكونات المراوح الثلاثة تطور عبر الزمن , مما أدى إلى نظام ايكولوجي مبتكر. تعود التغييرات الرئيسية إلى (1) تطوير برامج الدعم كعنصر فاعل جديد في النظام الايكولوجي (2) الالتزام المبكر بذلك من الشركات ومن بينهم الشركات الناشئة (3)التوسع الجغرافي لسيلكون فالي, والتي تضم الآن سان فرانسيسكو (4) التزام متزايد للجامعات بتوفير الأموال (5) ارتفاع عدد الشركات الصغرى المتعددة الجنسيات بسبب نقص المهارات واشتداد المنافسة في المنطقة .

. الكلمات المفتاح: السيلكون فالي ,النظام الايكولوجي للابتكار ,المراوح الثلاثة,التطور ,الشركات الناشئة
